# Supplementary material
Source: MDPI journal article supplement (https://www.mdpi.com/1996-1073/16/21/7376)
Supplement: s1 [file s1]

## Supplementary Materials

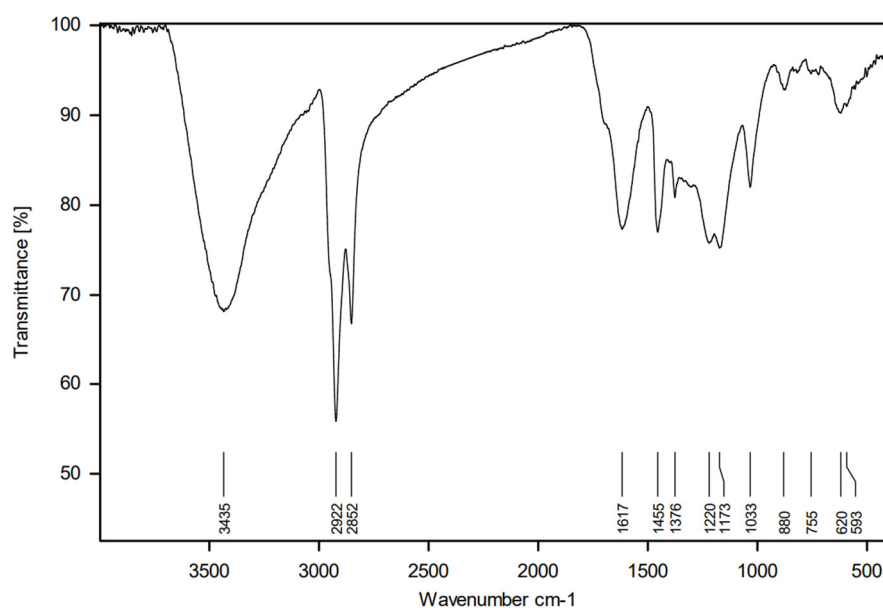

**Figure S1.** IR spectrum of products of oxidation of petroleum asphaltenes with  $(\text{NH}_4)_2\text{S}_2\text{O}_8/\text{H}_2\text{SO}_4$  [32]

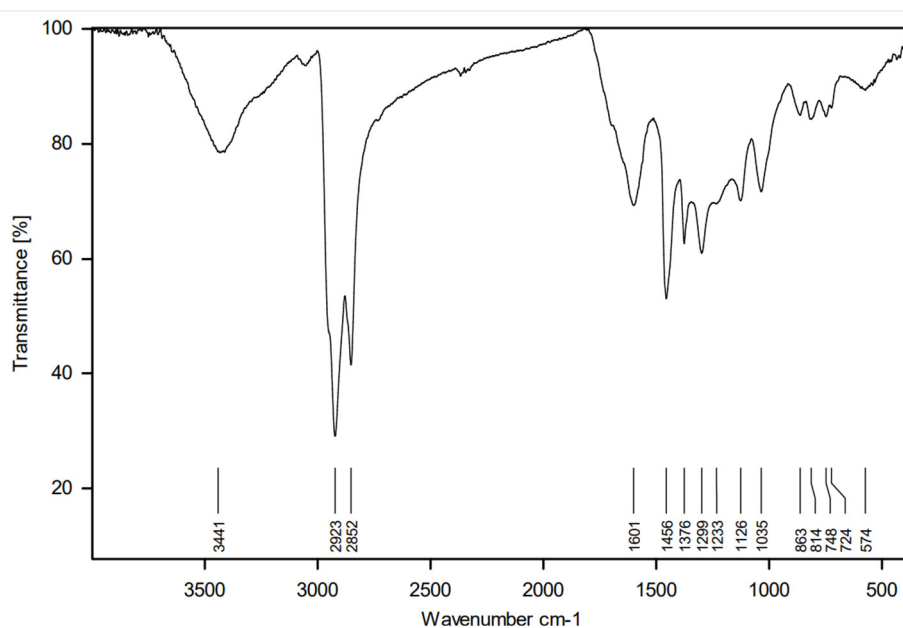

**Figure S2.** IR spectrum of products of oxidation of petroleum asphaltenes with  $\text{CH}_3\text{COOH}/\text{H}_2\text{O}_2$  [34]

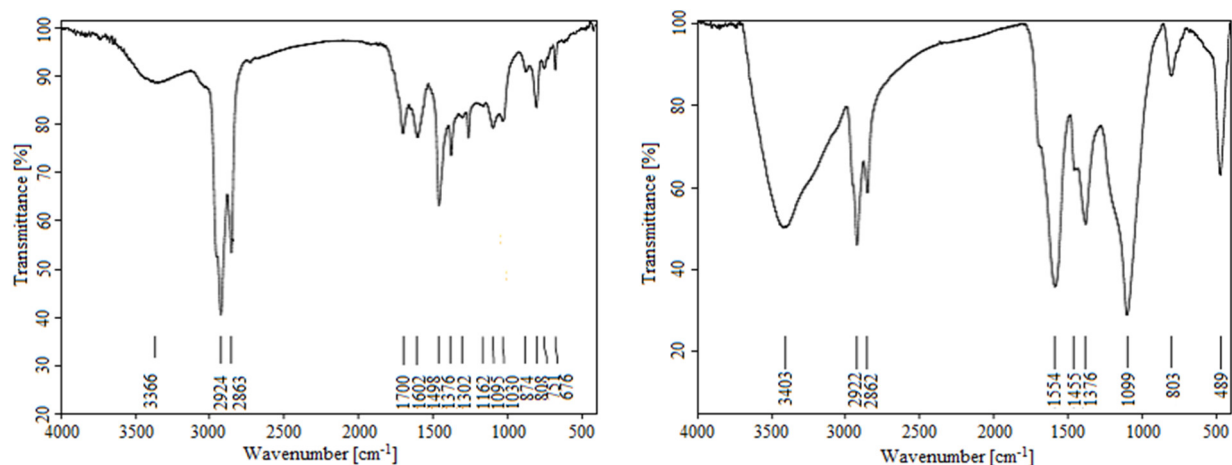

**Figure S3.** IR spectra of SP-1 (left) and SP-2 (right) products obtained by oxidation of petroleum asphaltenes with sodium percarbonate [40].

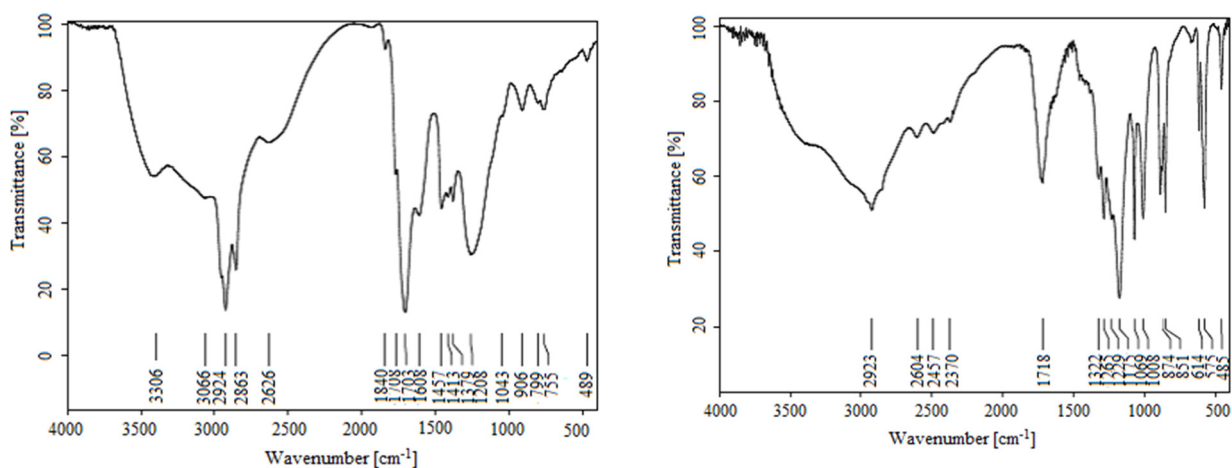

**Figure S4.** IR spectra of SP-3 (left) and SP-4 (right) products obtained by oxidation of petroleum asphaltenes with sodium percarbonate [40].

**Table S1.** Ion analysis results according to ESI-MS data (-) for SP-3 and SP-4 products

| Nº | compound          | structure                                                                            | MS diagnostic ion                                            |
|----|-------------------|--------------------------------------------------------------------------------------|--------------------------------------------------------------|
| 1  | Benzoic acid      | 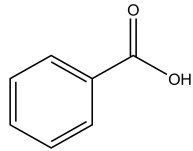 | 121(M <sup>-</sup> ), 77 (M <sup>-</sup> - CO <sub>2</sub> ) |
| 2  | Phenylacetic acid |  | 135 (M <sup>-</sup> )                                        |

|    |                                   |                                                                                      |                                                                              |
|----|-----------------------------------|--------------------------------------------------------------------------------------|------------------------------------------------------------------------------|
| 3  | Phthalic acid                     | 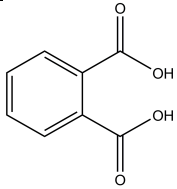   | 165 ( $M^-$ ), 149 ( $C_8H_5O_3$ ),<br>121 ( $M^- - CO_2$ )                  |
| 4  | 3-(4-Hydroxyphenyl)propionic acid |    | 165 ( $M^-$ )                                                                |
| 5  | 1-naphthoic acid                  |    | 171 ( $M^-$ ), 153 ( $M^- - H_2O$ ), 127 ( $M^- - CO_2$ )                    |
| 6  | Caffeic acid                      |    | 179 ( $M^-$ ), 135 ( $M^- - CO_2$ )                                          |
| 7  | 9-hydroxyphenalen-1-one           |  | 195 ( $M^-$ )                                                                |
| 8  | Anthracene-9-carboxylic acid      |  | 221 ( $M^-$ )                                                                |
| 9  | Sinapic acid                      |  | 223 ( $M^-$ )                                                                |
| 10 | 9-oxophenalene-1-carboxylic acid  |  | 223 ( $M^-$ ), 205 ( $M^- - H_2O$ ), 195 ( $M^- - CO$ ) 179 ( $M^- - CO_2$ ) |

|    |                                                                     |                                                                                      |                                                                                                                                                                                                                                                                                                      |
|----|---------------------------------------------------------------------|--------------------------------------------------------------------------------------|------------------------------------------------------------------------------------------------------------------------------------------------------------------------------------------------------------------------------------------------------------------------------------------------------|
| 11 | 6-(1-naphthyl) hexanoic acid                                        | 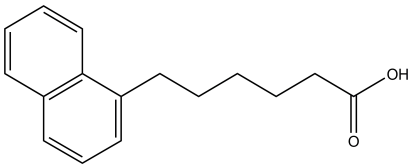   | 241 (M <sup>-</sup> ), 223 (M <sup>-</sup> - H <sub>2</sub> O), 205 (M <sup>-</sup> - H <sub>2</sub> O), 197 (M <sup>-</sup> - CO <sub>2</sub> ), 195 (C <sub>10</sub> H <sub>7</sub> (CH <sub>2</sub> ) <sub>3</sub> CH=CH)                                                                         |
| 12 | Diphenic acid                                                       |    | 241 (M <sup>-</sup> , 5), 197 (M <sup>-</sup> - CO <sub>2</sub> , 1), 179 (M <sup>-</sup> - CO <sub>2</sub> - H <sub>2</sub> O)                                                                                                                                                                      |
| 13 | 4-[2-ethyl-6-hydroxyphenyl]-2-oxobutanoic acid                      |    | 221 (M <sup>-</sup> ), 177 (M <sup>-</sup> - CO <sub>2</sub> ), 149 (M <sup>-</sup> - CO <sub>2</sub> - CO), 121 (M <sup>-</sup> - CO <sub>2</sub> - 2CO)                                                                                                                                            |
| 14 | 1-(2-)[3-Hydroxy-3-oxo-prop-1-enyl]anthracene-2-(1)-carboxylic acid |   | 291 (M <sup>-</sup> ), 273 (M <sup>-</sup> - H <sub>2</sub> O), 247 (M <sup>-</sup> - CO <sub>2</sub> ), 221 (M <sup>-</sup> - CO <sub>2</sub> - C <sub>2</sub> H <sub>2</sub> ), 203 (M <sup>-</sup> - 2CO <sub>2</sub> ), 177 (M <sup>-</sup> - 2CO <sub>2</sub> - C <sub>2</sub> H <sub>2</sub> ) |
| 15 | Ellagic acid                                                        |  | 301 (M <sup>-</sup> )                                                                                                                                                                                                                                                                                |
| 16 | Hexabenzocoronenic acid                                             |  | 565 (M <sup>-</sup> )                                                                                                                                                                                                                                                                                |
| 17 | Triethylmethylhydroxy ovalic acid                                   |  | 583 (M <sup>-</sup> )                                                                                                                                                                                                                                                                                |

|    |                                   |                                                                                     |                        |
|----|-----------------------------------|-------------------------------------------------------------------------------------|------------------------|
| 18 | Hexabenzocoronene diacid          | 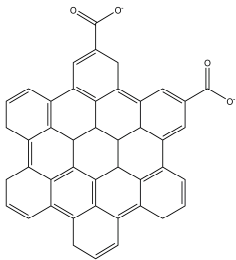  | 608 (M <sup>2-</sup> ) |
| 19 | Dicoronenic acid                  |   | 639 (M <sup>-</sup> )  |
| 20 | Hydroxydicoronedic diacid         |   | 701 (M <sup>-</sup> )  |
| 21 | Dihydroxyphenyldicoronenic diacid |  | 793 (M <sup>-</sup> )  |
